# Supplementary material for: Self-assembly of TiO2 composite microspheres: Facile synthesis, characterization and photocatalytic activities
Source: Royal Society of Chemistry journal article supplement (doi:10.1039/c2ce25468a), 2012-01-01
Supplement: c2ce25468a.pdf [file c2ce25468a.pdf]

## Supporting Information

### Self-assembly of TiO<sub>2</sub> Composite Microspheres: Facile Synthesis, Characterization and Photocatalytic Activities

Jin-Lin Hu, Hai-Sheng Qian,<sup>\*</sup> Yong Hu, Zheng-Quan Li, Guo-Xiu Tong, Tao-Kai Ying,  
Pei-Jun Gong, Shi-You Hao, Hong-Bao Zhang, Liang-Chao Li

Department of Chemistry, College of Chemistry and Life Sciences, Zhejiang Normal University, Jinhua 321004, P. R. China.

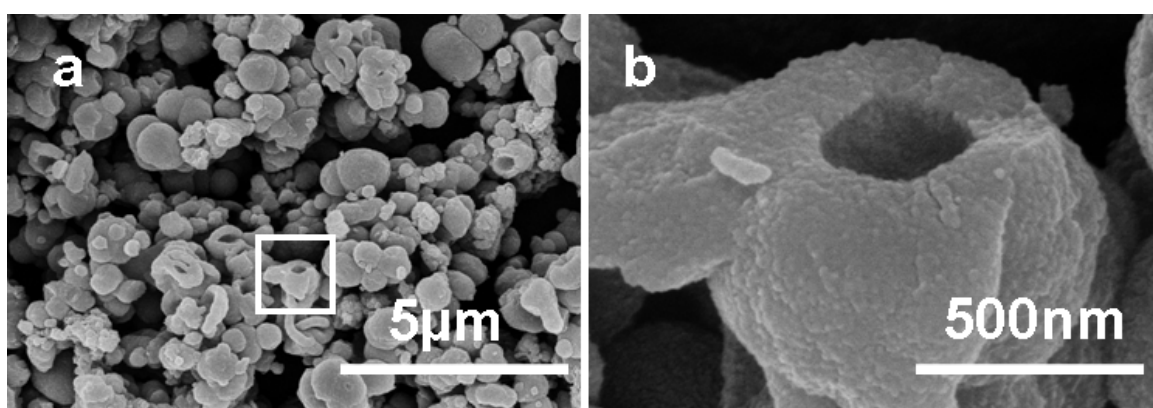

**Fig. S1.** (a,b) FESEM images of the as-prepared TiO<sub>2</sub> /SiO<sub>2</sub> composite microspheres after calcination at 500 °C for 2 h.

Fig. S1 show the FESEM images of the as-prepared TiO<sub>2</sub> /SiO<sub>2</sub> microspheres after calcination at 500 °C for 2 h, in which hollow microspheres have been observed and the structure of the formed microspheres collapses due to the decomposition of the siloxane polymers adsorbed on the surface of TiO<sub>2</sub> nanoparticles to get SiO<sub>2</sub> by releasing CO<sub>2</sub> while these TiO<sub>2</sub> nanoparticles aggregate with each other to form hollow microstructures.

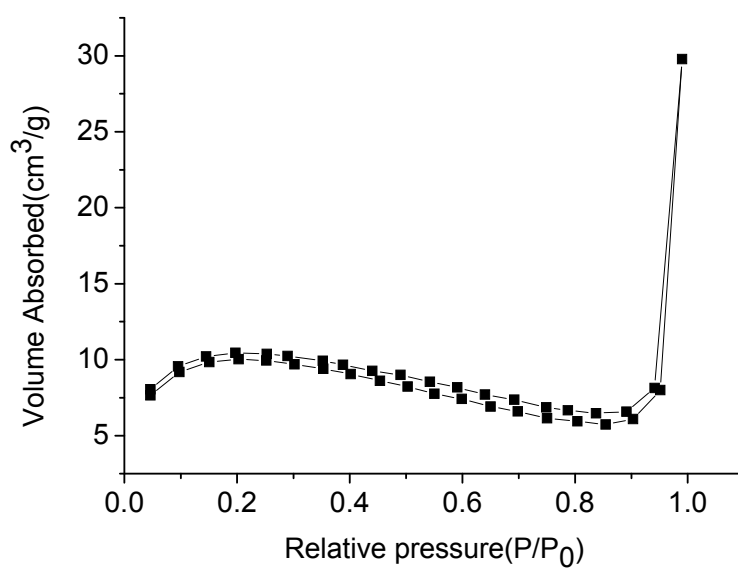

**Fig. S2.** N<sub>2</sub> adsorption-desorption isotherm of the sample obtained after calcination of the product shown in Figure 1 with 500 °C for 2 h.
